# Supplementary material for: Evolution of Symmetrical Grain Boundaries under External Strain in Iron Investigated by Molecular Dynamics Method
Source: MDPI journal article supplement (doi:10.3390/met12091448), 2022-08-30
Supplement: s1 [file s1]

Archive with 1 entries (1 files):
- metals-1848077-supplementary.pdf
