# Supplementary material for: Evolution of Symmetrical Grain Boundaries under External Strain in Iron Investigated by Molecular Dynamics Method
Source: MDPI journal article supplement (doi:10.3390/met12091448), 2022-08-30
Supplement: s1 [file s1 › metals-1848077-supplementary.pdf]

## Article

# Evolution of Symmetrical Grain Boundaries under External Strain in Iron Investigated by Molecular Dynamics Method

Wenxue Ma <sup>1</sup>, Yibin Dong <sup>1</sup>, Miaosen Yu <sup>1</sup>, Ziqiang Wang <sup>1</sup>, Yong Liu <sup>1</sup>, Ning Gao <sup>1,2,\*</sup>, Limin Dong <sup>3</sup> and Xuelin Wang <sup>1,\*</sup><sup>1</sup> Institute of Frontier and Interdisciplinary Science and Key Laboratory of Particle Physics and Particle Irradiation (MOE), Shandong University, Qingdao 266237, China<sup>2</sup> Institute of Modern Physics, Chinese Academy of Sciences, Lanzhou 730000, China<sup>3</sup> Department of Materials Science and Chemical Engineering, Harbin University of Science and Technology, Harbin 150080, China

\* Correspondence: ning.gao@sdu.edu.cn (N.G.); xuelinwang@sdu.edu.cn (X.W.)

**Abstract:** In the present work, the evolution of atomic structures and related changes in energy state, atomic displacement and free volume of symmetrical grain boundaries (GB) under the effects of external strain in body-centered cubic (bcc) iron are investigated by the molecular dynamics (MD) method. The results indicate that without external strain, full MD relaxations at high temperatures are necessary to obtain the lower energy states of GBs, especially for GBs that have lost the symmetrical feature near GB planes following MD relaxations. Under external strain, two mechanisms are explored for the failure of these GBs, including slip system activation, dislocation nucleation and dislocation network formation induced directly by either the external strain field or by phase transformation from the initial bcc to fcc structure under the effects of external strain. Detailed analysis shows that the change in free volume is related to local structure changes in these two mechanisms, and can also lead to increases in local stress concentration. These findings provide a new explanation for the failure of GBs in BCC iron systems.

**Keywords:** grain boundary; free volume; strain effect; micro-cracking; molecular dynamics

**Citation:** Ma, W.; Dong, W.; Yu, M.; Wang, Z.; Liu, Y.; Gao, N.; Dong, L.; Wang, X. Evolution of Symmetrical Grain Boundaries under External Strain in Iron Investigated by Molecular Dynamics Method. *Metals* **2022**, *12*, 1448. <https://doi.org/10.3390/met12091448>

Academic Editors: Angelo Fernando Padilha and Alain Pasturel

Received: 19 July 2022

Accepted: 28 August 2022

Published: 30 August 2022

**Publisher's Note:** MDPI stays neutral with regard to jurisdictional claims in published maps and institutional affiliations.

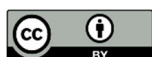

**Copyright:** © 2022 by the authors. Licensee MDPI, Basel, Switzerland. This article is an open access article distributed under the terms and conditions of the Creative Commons Attribution (CC BY) license (<https://creativecommons.org/licenses/by/4.0/>).

**Table S1.** The peak tensile stresses of all cases studied in this work are listed in table.

| Model            | Strain | Stress/GPa |
|------------------|--------|------------|
| $\Sigma=3(112)$  | 10.65% | 13.43      |
| Single crystal   | 13.50% | 16.08      |
| $\Sigma=3(111)$  | 13.70% | 15.96      |
| Single crystal   | 22.85% | 27.49      |
| $\Sigma=5(012)$  | 8.30%  | 10.098     |
| Single crystal   | 10.30% | 14.3       |
| $\Sigma=5(013)$  | 8.50%  | 9.18       |
| Single crystal   | 9.25%  | 11.76      |
| $\Sigma=9(221)$  | 9.50%  | 12.43      |
| Single crystal   | 16.80% | 22.27      |
| $\Sigma=11(113)$ | 8.75%  | 9.27       |
| Single crystal   | 10.40% | 12.89      |
| $\Sigma=17(410)$ | 8.15%  | 9.12       |
| Single crystal   | 8.90%  | 10.8       |

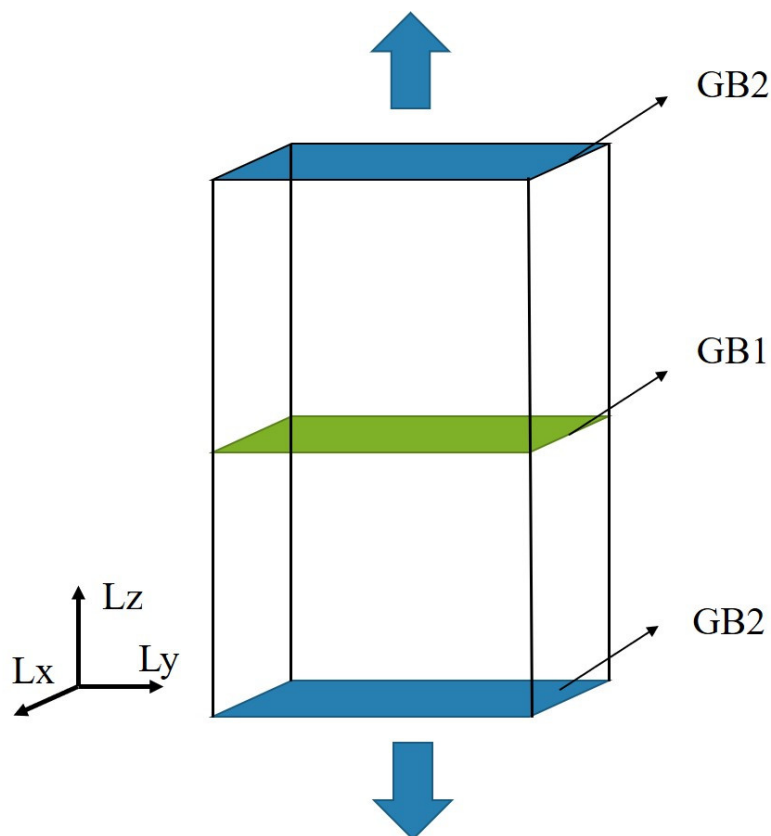**Figure S1.** Schematic of grain boundary simulation model used in the present work. For stress-strain simulations, the external tensile strain field is applied on top and bottom surface of box.

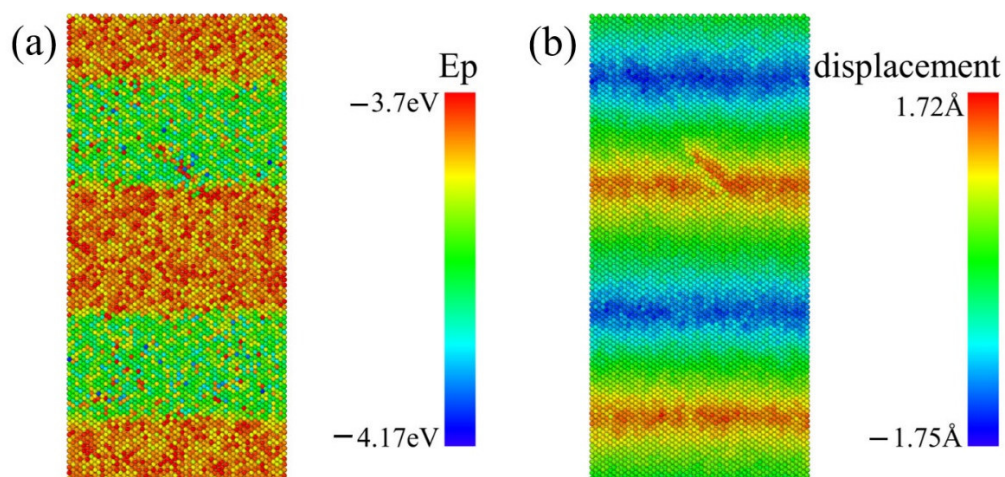

**Figure S2.** Atomic potential energy (a) and displacement distribution (b) of  $\Sigma 3(112)$  GB at state with peak stress.

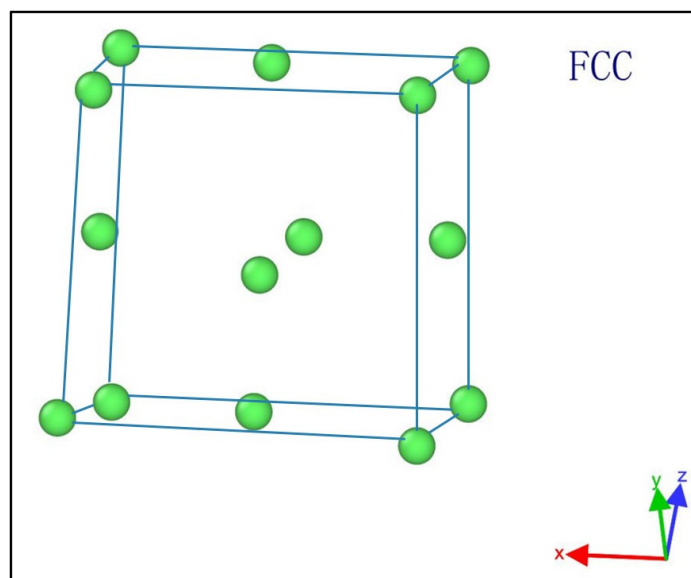

**Figure S3.** Example of FCC lattice structure in fcc phase after phase transition.

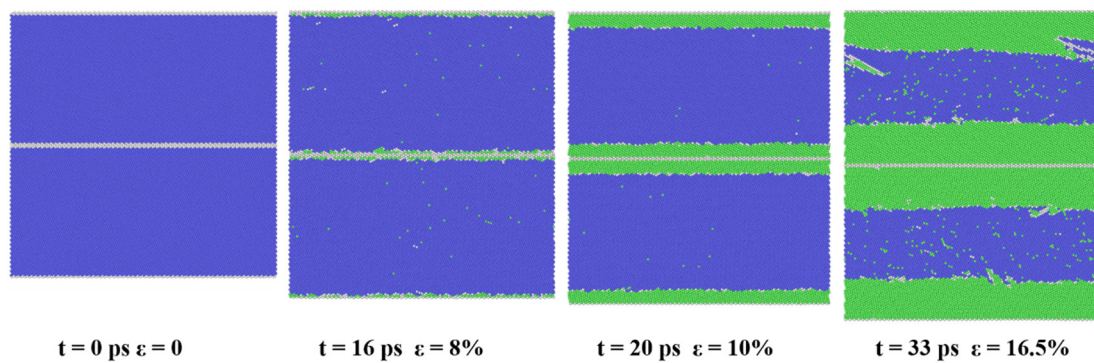

**Figure S4.** Snapshots (y-z plane) shows  $\Sigma = 5(013)$  undergoes phase transition and green atom is fcc structure blue atom is bcc. Then the GB happens to crack at 31 ps, region a, b and c are most obvious.

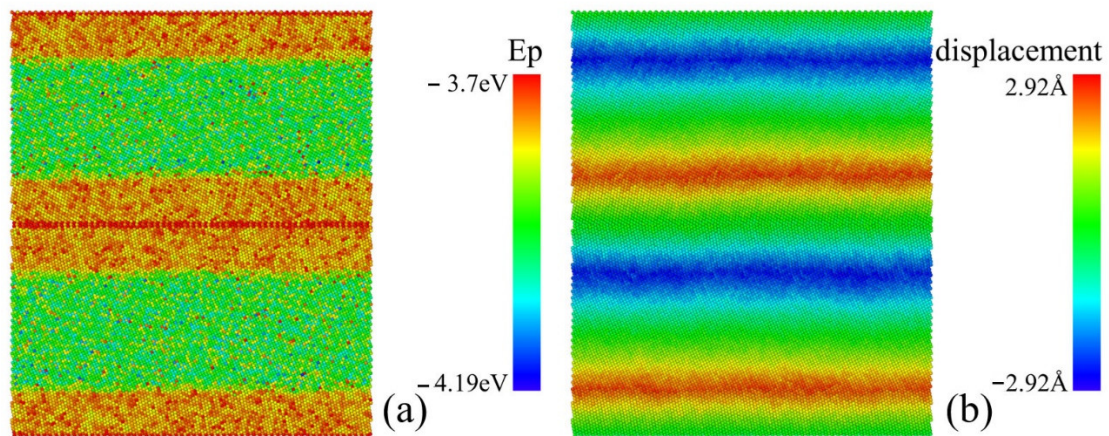

**Figure S5.** Atomic potential energy (a) and displacement distribution (b) of  $\Sigma 5(013)$  GB at state with peak stress.

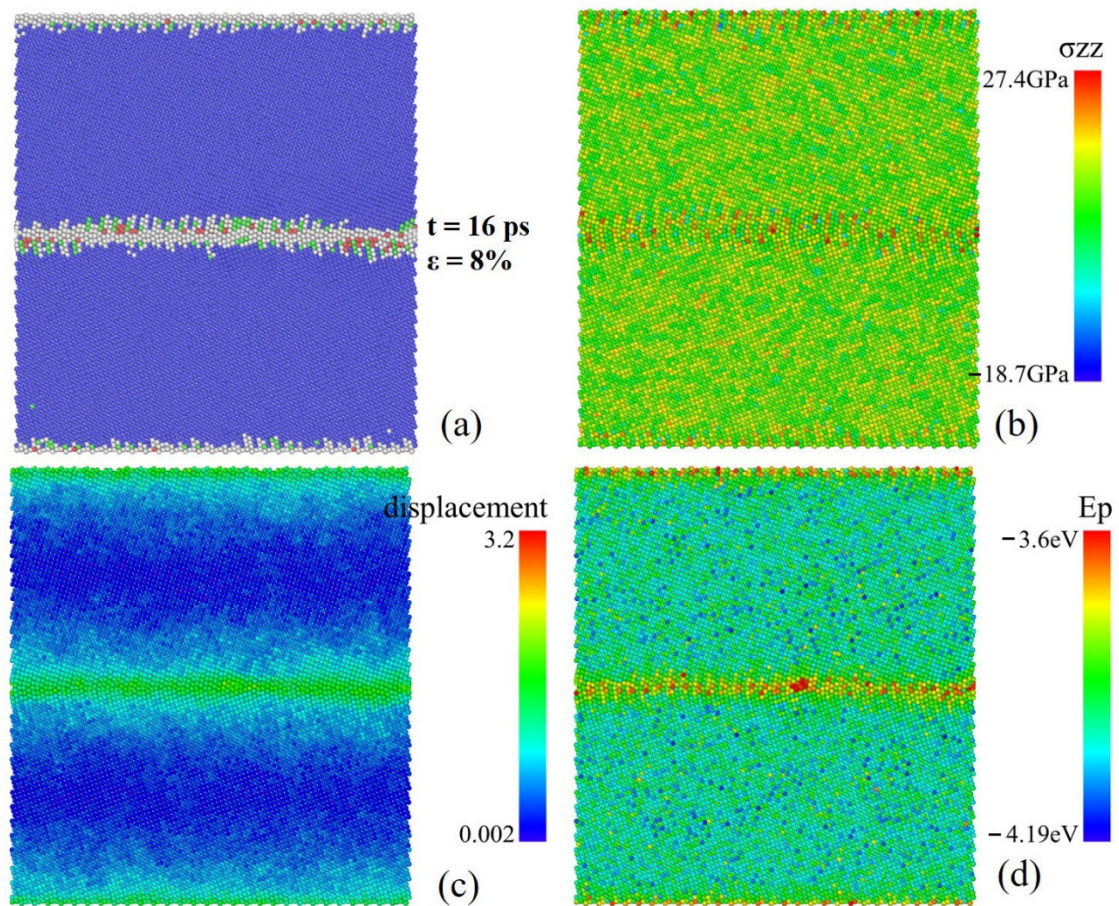

**Figure S6.** (a) The structure of  $\Sigma 5(012)$  when slip system is activated with strain around 8%. The potential energy (b), stress (c) and atomic displacement distribution (d) at this state are shown respectively.

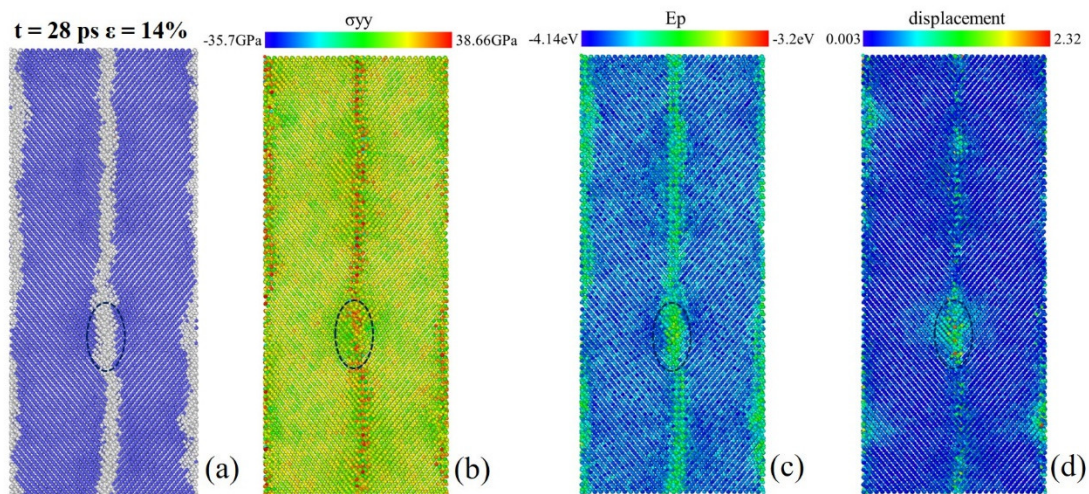

**Figure S7.** (a) The structure of  $\Sigma 3(111)$  when slip system is activated with strain around 14%. The potential energy, stress and atomic displacement distribution at this state are shown in (b), (c) and (d) respectively.

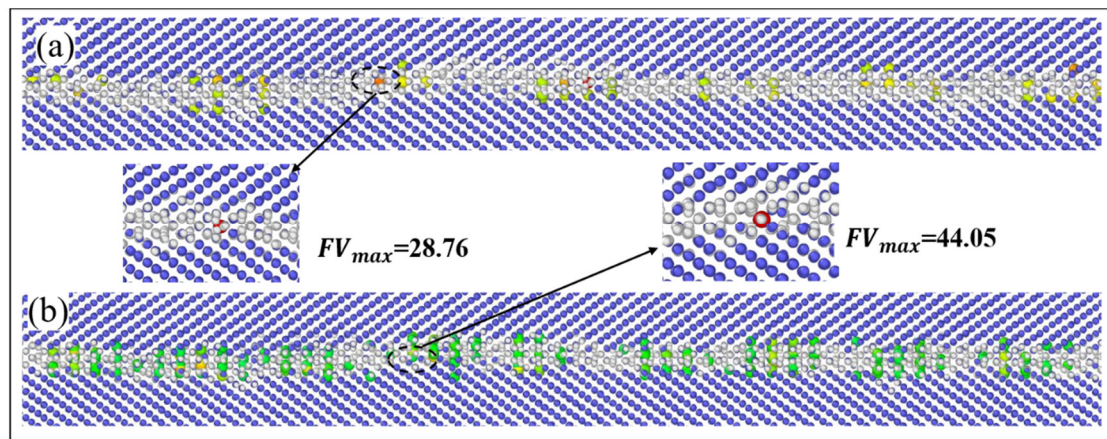

**Figure S8.** Distribution of free volume near  $\Sigma 3(111)$  GB region at (a) 0 ps and (b) at 28 ps (strain around 14%).
